# Supplementary material for: Shensu IV prevents glomerular podocyte injury in nephrotic rats via promoting lncRNA H19/DIRAS3-mediated autophagy
Source: PubMed Central journal article supplement (PMC8112846; doi:10.1042/bsr20203362), 2021-05-04

sFig.1 Original blots for Figure.4 and Figure.9A.

Figure.5

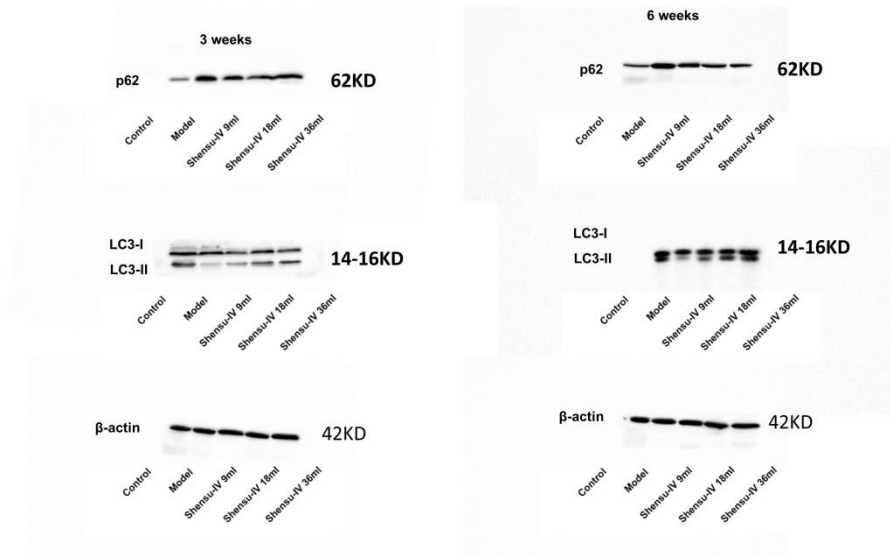

Figure.9A

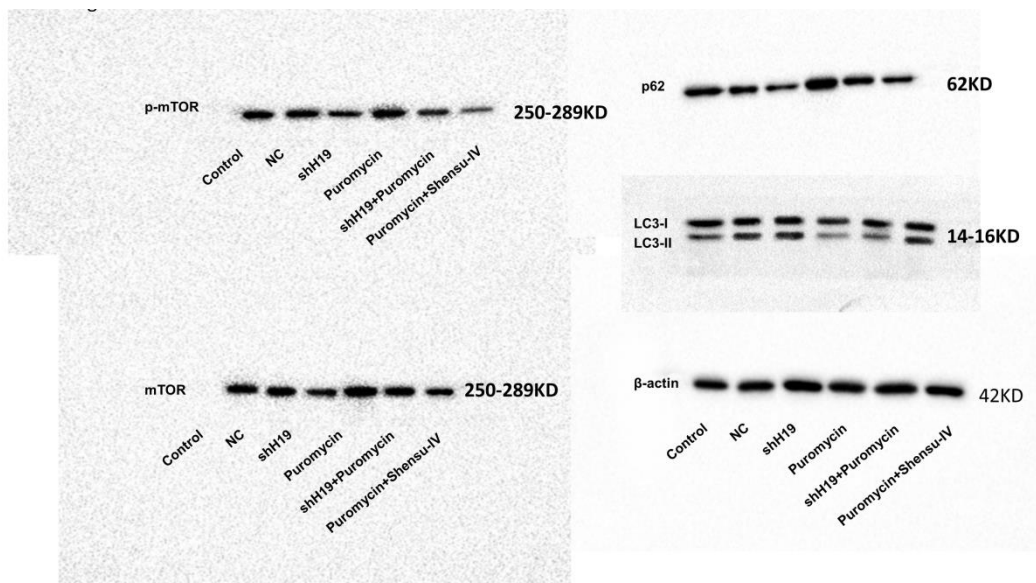

Supplement: BSR-2020-3362_supp.pdf [file BSR-2020-3362_supp.pdf]
